# Supplementary material
Source: publisher site journal article supplement (https://www.spandidos-publications.com/3327/downloadSupplementary)

Figure S1. Images of immunohistochemistry-positive and negative controls. Photomicrographs of paired, stained tissue samples with (left column) and without (right column) antibodies (hematoxylin counterstain, all x200 magnification). Immunostaining include antibodies against vimentin for (A) fibrous tissue and (B) epithelial tissue of parathyroid gland. CKpan staining for (C) epithelial tissue of adenocarcinoma and (D) fibrous tissue of hemangioma. ALK staining for (E) inflammatory myofibroblastic tumor tissue and (F) schwannoma. CD34 for (G) solitary fibrous tumor tissue and (H) lymphatic tissue of lymphoma. S-100 for (I) gastrointestinal stromal tumor tissue and (J) colonic mucosal tissue. Anoctamin-1 for (K) gastrointestinal stromal tumor tissue and (L) tumor tissue of leiomyoma. CD117 for (M) gastrointestinal stromal tumor tissue and (N) tumor tissue of leiomyoma. Ki-67 for (O) lymphatic tissue and (P) tumor tissue of leiomyoma.

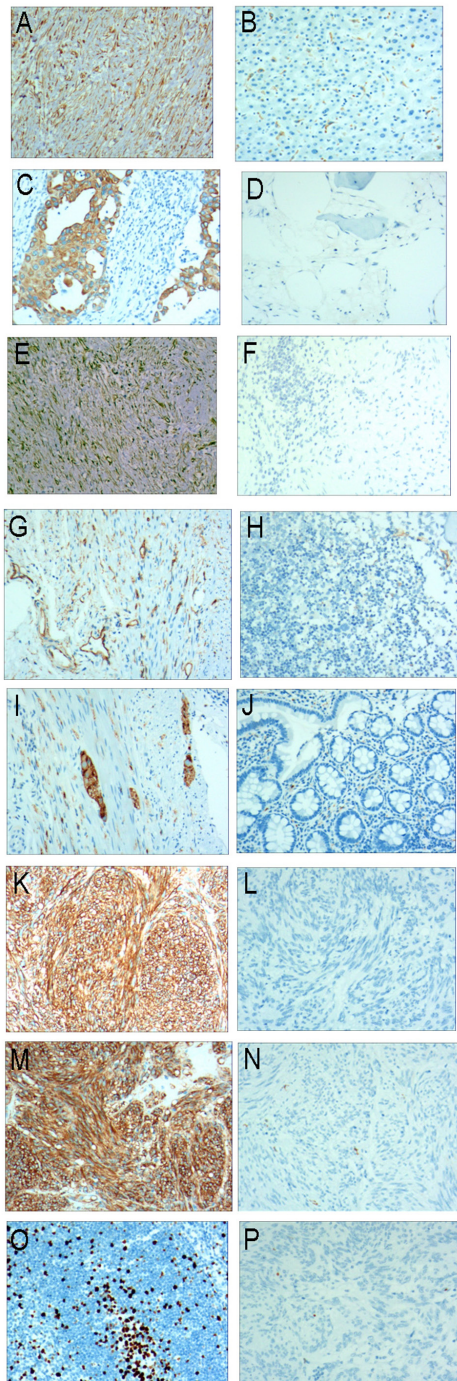

Supplement: Supplementary file 1 [file downloadSupplementary]
